# Supplementary material for: Synthesis of 1,3,4-Thiadiazole Derivatives and Their Anticancer Evaluation
Source: MDPI journal article supplement (doi:10.3390/ijms242417476), 2023-12-14
Supplement: s1 [file s1]

# Synthesis of 1,3,4-Thiadiazole Derivatives and their Anticancer Evaluation

Camelia Elena Stecoza <sup>1</sup>, George Mihai Nitulescu <sup>1,\*</sup>, Constantin Draghici <sup>2</sup>, Miron Teodor Caproiu <sup>2</sup>, Anamaria Hanganu <sup>2</sup>, Octavian Tudorel Olaru <sup>1</sup>, Dragos Paul Mihai <sup>1</sup>, Marinela Bostan <sup>3</sup> and Mirela Mihaila <sup>3</sup>

**Table S1.** The 95% confidence intervals for the calculated IC<sub>50</sub> values.

| Substance | Confidence intervals (24 h) |                |                | Confidence intervals (48 h) |                |                |
|-----------|-----------------------------|----------------|----------------|-----------------------------|----------------|----------------|
|           | HUVEC                       | LoVo           | MCF-7          | HUVEC                       | LoVo           | MCF-7          |
| 2a        | NC *                        | 147.4 to 281.2 | NC *           | 75.57 to 92.85              | 55.16 to 70.05 | NC *           |
| 2b        | NC *                        | 109.7 to 163.1 | NC *           | 44.10 to 114.1              | 92.19 to 168.2 | NC *           |
| 2c        | NC *                        | 135.5 to 196.8 | NC *           | 134.8 to 178.4              | 95.09 to 144.9 | 294.6 to 537.3 |
| 2d        | NC *                        | 43.92 to 65.51 | 126.2 to 188.6 | 73.14 to 122.9              | 26.01 to 32.69 | 113.5 to 130.2 |
| 2e        | NC *                        | 88.12 to 131.3 | NC *           | 199.6 to 451.6              | 57.24 to 109.5 | NC *           |
| 2f        | NC *                        | NC *           | NC *           | NC *                        | 67.22 to 96.90 | NC *           |
| 2g        | NC *                        | 16.01 to 20.41 | 38.98 to 48.20 | 35.71 to 55.57              | 1.62 to 3.66   | 20.39 to 26.59 |
| 3a        | NC *                        | NC *           | NC *           | NC *                        | > 400          | NC *           |
| 3b        | NC *                        | 156.6 to 193.5 | NC *           | NC *                        | 47.13 to 82.95 | NC *           |
| 3c        | NC *                        | NC *           | NC *           | NC *                        | > 400          | NC *           |
| Cis-Pt    | 8.93 to 13.89               | 10.19 to 16.18 | NT*            | 6.71 to 10.09               | 69.62 to 92.23 | NT*            |
| DOX       | 0.52 to 2.04                | NC *           | 94.57 to 176.3 | 0.96 to 1.90                | NC*            | 73.45 to 104.0 |

\* NC = not calculated.
